# Supplementary material for: Comparison of Hydration Properties of Cement‐Carbon Steel Slag and Cement‐Stainless Steel Slag Blended Binder
Source: Hindawi journal article supplement (doi:10.1155/2018/1851367), 2018-01-01
Supplement: f3 [file 1851367.f3.docx]

| Water to binder ratio (%) | Penetration depth of Vicat plunger (mm) | | |
| --- | --- | --- | --- |
| Cement | CS | SS |
| 22 | 28 | 31 | 32 |
| **24** | 29 | **33** | **34** |
| 26 | 31 | 36 | 37 |
| **28** | **33** | 40 | 40 |

**Standard consistency**

**Variation of penetration depth with varying water to binder ratio**

Water demand ratio of CC and SS slags mortars

**Figure8. Water demand ratio of BOF C and EAF S slags mortars**

**Figure8. Water demand ratio of BOF C and EAF S slags mortars**
