# Supplementary figures and images for: Comparison of Hydration Properties of Cement‐Carbon Steel Slag and Cement‐Stainless Steel Slag Blended Binder
Source: Hindawi journal article supplement (doi:10.1155/2018/1851367), 2018-01-01

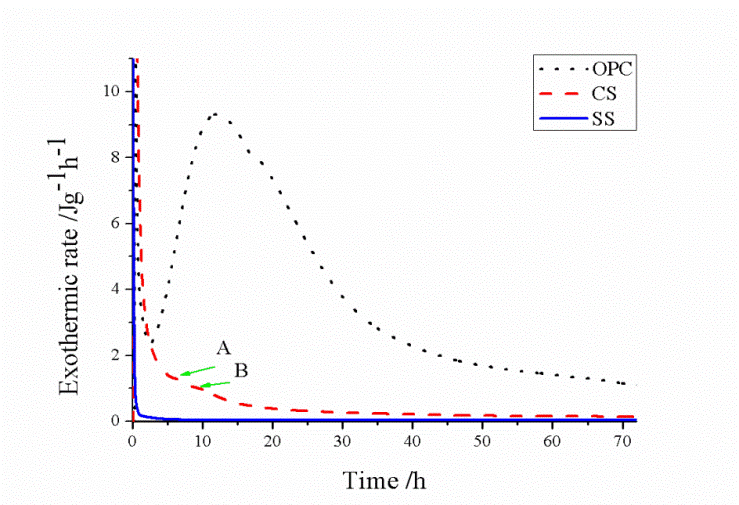


(a) The heat flow and (b) the cumulative heat of cement, CS and SS


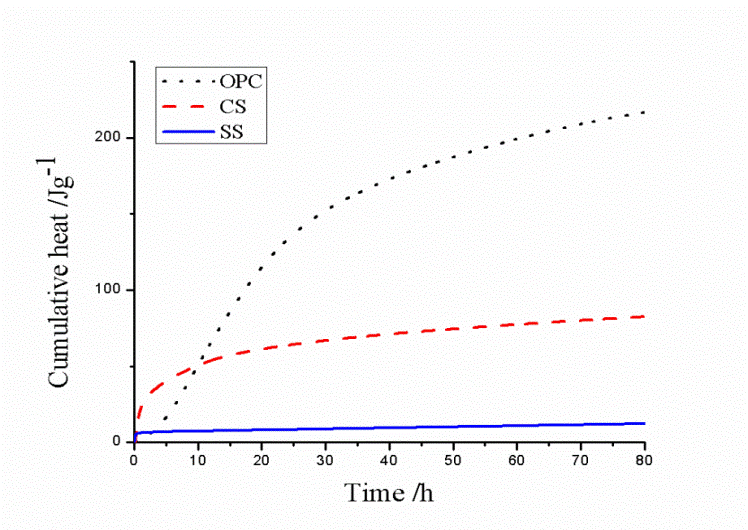


(a)

(a)

Supplement: f2 [file 1851367.f2.docx]
